# Supplementary material for: Illumina Short-Read Sequencing of the Mitogenomes of Novel Scarites subterraneus Isolates Allows for Taxonomic Refinement of the Genus Scarites Fabricius 1775, within the Carabidae Family
Source: MDPI journal article supplement (doi:10.3390/insects13020190), 2022-02-11
Supplement: s1 [file s1]

**Table S1.** Organization of the *Scarites subterraneus* mitogenome. A. *Scarites subterraneus* ssp. *nebraskensis*. B. *Scarites subterraneus* ssp. *arkansensis*. Mitogenomes were annotated using MitoS2.

| <b><i>Scarites. sp nebraskensis</i></b> |              |             |               |               | <b><i>Scarites sp. arkansensis</i></b> |              |             |               |               |
|-----------------------------------------|--------------|-------------|---------------|---------------|----------------------------------------|--------------|-------------|---------------|---------------|
| <b>Name</b>                             | <b>Start</b> | <b>Stop</b> | <b>Strand</b> | <b>Length</b> | <b>Name</b>                            | <b>Start</b> | <b>Stop</b> | <b>Strand</b> | <b>Length</b> |
| OH_0                                    | 550          | 764         | +             | 215           | nad1                                   | 10           | 951         | -             | 942           |
| trnI(gat)                               | 1371         | 1436        | +             | 66            | trnL1(tag)                             | 961          | 1025        | -             | 65            |
| trnQ(ttg)                               | 1439         | 1507        | -             | 69            | rrnL                                   | 1003         | 2326        | -             | 1324          |
| trnM(cat)                               | 1517         | 1585        | +             | 69            | trnV(tac)                              | 2351         | 2422        | -             | 72            |
| nad2                                    | 1607         | 2614        | +             | 1008          | rrnS                                   | 2423         | 3211        | -             | 789           |
| trnW(tca)                               | 2617         | 2680        | +             | 64            | OH_0                                   | 3626         | 3854        | +             | 229           |
| trnC(gca)                               | 2710         | 2777        | -             | 68            | trnI(gat)                              | 4470         | 4535        | +             | 66            |
| OH_1-a                                  | 2748         | 2804        | +             | 57            | trnQ(ttg)                              | 4538         | 4606        | -             | 69            |
| trnY(gta)                               | 2783         | 2850        | -             | 68            | trnM(cat)                              | 4616         | 4684        | +             | 69            |
| cox1                                    | 2856         | 4391        | +             | 1536          | nad2                                   | 4706         | 5713        | +             | 1008          |
| trnL2(taa)                              | 4401         | 4466        | +             | 66            | trnW(tca)                              | 5716         | 5779        | +             | 64            |
| cox2                                    | 4468         | 5175        | +             | 708           | trnC(gca)                              | 5809         | 5876        | -             | 68            |
| trnK(ctt)                               | 5156         | 5226        | +             | 71            | OH_1-a                                 | 5847         | 5903        | +             | 57            |
| trnD(gtc)                               | 5227         | 5293        | +             | 67            | trnY(gta)                              | 5882         | 5949        | -             | 68            |
| atp8_0                                  | 5294         | 5455        | +             | 162           | cox1                                   | 5955         | 7490        | +             | 1536          |
| atp6                                    | 5449         | 6126        | +             | 678           | trnL2(taa)                             | 7500         | 7565        | +             | 66            |
| cox3                                    | 6136         | 6924        | +             | 789           | cox2                                   | 7567         | 8274        | +             | 708           |
| trnG(tcc)                               | 6924         | 6989        | +             | 66            | trnK(ctt)                              | 8255         | 8325        | +             | 71            |
| OH_1-b                                  | 6971         | 7036        | +             | 66            | trnD(gtc)                              | 8326         | 8392        | +             | 67            |
| nad3                                    | 6990         | 7343        | +             | 354           | atp8_0                                 | 8393         | 8554        | +             | 162           |
| trnA(tgc)                               | 7342         | 7406        | +             | 65            | atp6                                   | 8548         | 9225        | +             | 678           |
| trnR(tcg)                               | 7415         | 7481        | +             | 67            | cox3                                   | 9235         | 10023       | +             | 789           |
| trnN(gtt)                               | 7486         | 7551        | +             | 66            | trnG(tcc)                              | 10023        | 10088       | +             | 66            |
| trnS1(gct)                              | 7552         | 7618        | +             | 67            | OH_1-b                                 | 10070        | 10135       | +             | 66            |
| trnE(ttc)                               | 7619         | 7686        | +             | 68            | nad3                                   | 10089        | 10442       | +             | 354           |
| trnF(gaa)                               | 7685         | 7751        | -             | 67            | trnA(tgc)                              | 10441        | 10505       | +             | 65            |
| nad5                                    | 7762         | 9480        | -             | 1719          | trnR(tcg)                              | 10514        | 10580       | +             | 67            |
| trnH(gtg)                               | 9512         | 9563        | -             | 52            | trnN(gtt)                              | 10585        | 10650       | +             | 66            |
| nad4                                    | 9563         | 10903       | -             | 1341          | trnS1(gct)                             | 10651        | 10717       | +             | 67            |
| nad4l                                   | 10897        | 11190       | -             | 294           | trnE(ttc)                              | 10718        | 10785       | +             | 68            |
| trnT(tgt)                               | 11193        | 11257       | +             | 65            | trnF(gaa)                              | 10784        | 10850       | -             | 67            |
| trnP(tgg)                               | 11258        | 11322       | -             | 65            | nad5                                   | 10861        | 12579       | -             | 1719          |
| nad6                                    | 11343        | 11849       | +             | 507           | trnH(gtg)                              | 12611        | 12662       | -             | 52            |
| cob                                     | 11849        | 12985       | +             | 1137          | nad4                                   | 12662        | 14002       | -             | 1341          |
| trnS2(tga)                              | 12985        | 13052       | +             | 68            | nad4l                                  | 13996        | 14289       | -             | 294           |
| nad1                                    | 13074        | 14015       | -             | 942           | trnT(tgt)                              | 14292        | 14356       | +             | 65            |
| trnL1(tag)                              | 14025        | 14089       | -             | 65            | trnP(tgg)                              | 14357        | 14421       | -             | 65            |
| rrnL                                    | 14067        | 15390       | -             | 1324          | nad6                                   | 14442        | 14948       | +             | 507           |
| trnV(tac)                               | 15416        | 15487       | -             | 72            | cob                                    | 14948        | 16084       | +             | 1137          |
| rrnS                                    | 15488        | 16241       | -             | 754           | trnS2(tga)                             | 16084        | 16151       | +             | 68            |
